# Supplementary material for: Lipid scrambling is a general feature of protein insertases
Source: PubMed Central journal article supplement (PMC10491306; doi:10.1101/2023.09.01.555937), 2023-09-01
Supplement: NIHPP2023.09.01.555937v1-supplement-1.pdf [file NIHPP2023.09.01.555937v1-supplement-1.pdf]

## Supporting Material

**Table S1.** Details about all simulated systems. Systems for which the uniprot ID is provided means that the available AlphaFold (AF) model was used. All oligomers were predicted with AF multimer.

| ID | System (number of chains) | Organism             | Source (Uniprot ID, PDB code or AlphaFold) | Total # of DOPC lipids | Total events | MD run length |
|----|---------------------------|----------------------|--------------------------------------------|------------------------|--------------|---------------|
| 1  | TMEM16K (2)               | <i>H. sapiens</i>    | PDB: 5OC9                                  | 1000                   | 251          | 20 $\mu$ s    |
| 2  | TMEM16K (2)               | <i>H. sapiens</i>    | PDB: 6R65                                  | 1000                   | 278          | 20 $\mu$ s    |
| 3  | TMEM16K (2)               | <i>H. sapiens</i>    | PDB: 6R7X                                  | 1000                   | 10           | 20 $\mu$ s    |
| 4  | TMEM16K (2)               | <i>H. sapiens</i>    | PDB: 6R7Y                                  | 1000                   | 7            | 20 $\mu$ s    |
| 5  | TMEM16K (2)               | <i>H. sapiens</i>    | PDB: 6R7Z                                  | 1000                   | 28           | 20 $\mu$ s    |
| 6  | TMEM16F (2)               | <i>M. musculus</i>   | PDB: 8B8Q                                  | 800                    | 27           | 20 $\mu$ s    |
| 7  | TMEM16A (2)               | <i>M. musculus</i>   | PDB: 7ZK3                                  | 800                    | 29           | 20 $\mu$ s    |
| 8  | TMEM41B (1)               | <i>H. sapiens</i>    | ID: Q5BJD5                                 | 600                    | 22           | 20 $\mu$ s    |
| 9  | VMP1 (1)                  | <i>H. sapiens</i>    | ID: Q96GC9                                 | 600                    | 24           | 20 $\mu$ s    |
| 10 | TMEM41B - VMP1 (2)        | <i>H. sapiens</i>    | ID: Q5BJD5<br>ID: Q96GC9                   | 800                    | 31           | 20 $\mu$ s    |
| 11 | ATG9 (3)                  | <i>S. pombe</i>      | PDB: 7D0I                                  | 1200                   | 175          | 20 $\mu$ s    |
| 12 | ATG9A (3)                 | <i>H. sapiens</i>    | PDB: 6WQZ                                  | 1200                   | 93           | 20 $\mu$ s    |
| 13 | VDAC1 (1)                 | <i>H. sapiens</i>    | PDB: 6G6U                                  | 600                    | 24           | 20 $\mu$ s    |
| 14 | VDAC1 (2)                 | <i>H. sapiens</i>    | PDB: 6G6U                                  | 800                    | 161          | 20 $\mu$ s    |
| 15 | VDAC2 (1)                 | <i>D. rerio</i>      | PDB: 4BUM                                  | 800                    | 25           | 20 $\mu$ s    |
| 16 | VDAC2 (2)                 | <i>D. rerio</i>      | PDB: 4BUM                                  | 800                    | 231          | 20 $\mu$ s    |
| 17 | VDAC3 (1)                 | <i>H. sapiens</i>    | ID: Q9Y277                                 | 800                    | 24           | 20 $\mu$ s    |
| 18 | VDAC3 (2)                 | <i>H. sapiens</i>    | ID: Q9Y277                                 | 800                    | 319          | 20 $\mu$ s    |
| 19 | Rhodopsin (1)             | <i>B. taurus</i>     | PDB: 4A4M                                  | 800                    | 19           | 20 $\mu$ s    |
| 20 | Rhodopsin (2)             | <i>B. taurus</i>     | PDB: 4A4M                                  | 800                    | 39           | 20 $\mu$ s    |
| 21 | MCP1 (1)                  | <i>S. cerevisiae</i> | ID: Q12106                                 | 600                    | 26           | 20 $\mu$ s    |
| 22 | MCP1 (2)                  | <i>S. cerevisiae</i> | ID: Q12106                                 | 800                    | 33           | 20 $\mu$ s    |
| 23 | Xk (1)                    | <i>H. sapiens</i>    | ID: P51811                                 | 800                    | 9            | 20 $\mu$ s    |
| 24 | Xkr8 (1)                  | <i>H. sapiens</i>    | PDB: 7DCE                                  | 800                    | 11           | 20 $\mu$ s    |
| 25 | Xkr9 (1)                  | <i>R. norvegicus</i> | PDB: 7P16                                  | 800                    | 8            | 20 $\mu$ s    |
| 26 | GlpG (1)                  | <i>E. coli</i>       | PDB: 3B45                                  | 600                    | 3            | 20 $\mu$ s    |

|    |                   |                      |            |      |     |            |
|----|-------------------|----------------------|------------|------|-----|------------|
| 27 | Spns1 (1)         | <i>H. sapiens</i>    | ID: Q9H2V7 | 800  | 3   | 20 $\mu$ s |
| 28 | MFSD2A (1)        | <i>H. sapiens</i>    | PDB: 7OIX  | 800  | 5   | 20 $\mu$ s |
| 29 | ABCB1 (1)         | <i>H. sapiens</i>    | PDB: 7A69  | 1000 | 4   | 20 $\mu$ s |
| 30 | ABCB4 (4)         | <i>H. sapiens</i>    | PDB: 6S7P  | 800  | 9   | 20 $\mu$ s |
| 31 | ABCB11 (11)       | <i>H. sapiens</i>    | PDB: 6LR0  | 800  | 8   | 20 $\mu$ s |
| 32 | ABCG40 (1)        | <i>A. thaliana</i>   | ID: Q9M9E1 | 1200 | 2   | 20 $\mu$ s |
| 33 | MsbA (2)          | <i>E. coli</i>       | PDB: 7PH4  | 800  | 1   | 20 $\mu$ s |
| 34 | PgIK (2)          | <i>C. jejuni</i>     | PDB: 5C73  | 800  | 15  | 20 $\mu$ s |
| 35 | PgIK (2)          | <i>C. jejuni</i>     | PDB: 5C76  | 1000 | 18  | 20 $\mu$ s |
| 36 | PgIK (2)          | <i>C. jejuni</i>     | PDB: 5C78  | 1000 | 19  | 20 $\mu$ s |
| 37 | SERCA2b (1)       | <i>H. sapiens</i>    | PDB: 7E7S  | 800  | 9   | 20 $\mu$ s |
| 38 | DGGGP (1)         | <i>M. jannaschii</i> | PDB: 6M31  | 800  | 1   | 20 $\mu$ s |
| 39 | DGGGP (2)         | <i>M. jannaschii</i> | PDB: 6M31  | 800  | 1   | 20 $\mu$ s |
| 40 | Drs2p (1)         | <i>S. cerevisiae</i> | PDB: 6ROH  | 1200 | 8   | 20 $\mu$ s |
| 41 | Drs2p (1)         | <i>S. cerevisiae</i> | PDB: 6ROI  | 1200 | 7   | 20 $\mu$ s |
| 42 | Drs2p (1)         | <i>S. cerevisiae</i> | PDB: 6ROJ  | 1000 | 3   | 20 $\mu$ s |
| 43 | VAMP2 (1)         | <i>H. sapiens</i>    | ID: P63027 | 600  | 0   | 20 $\mu$ s |
| 44 | VAMP2 (2)         | <i>H. sapiens</i>    | ID: P63027 | 1000 | 2   | 20 $\mu$ s |
| 45 | YidC (1)          | <i>B. halodurans</i> | PDB: 3WO6  | 600  | 16  | 20 $\mu$ s |
| 46 | YidC<br>R72A (1)  | <i>B. halodurans</i> | PDB: 3WO6  | 800  | 8   | 20 $\mu$ s |
| 47 | YidC (1)          | <i>B. halodurans</i> | PDB: 3WO7  | 800  | 10  | 20 $\mu$ s |
| 48 | MisCB (1)         | <i>B. subtilis</i>   | ID: P54544 | 800  | 33  | 20 $\mu$ s |
| 49 | Oxa1 (1)          | <i>S. cerevisiae</i> | ID: P39952 | 800  | 45  | 20 $\mu$ s |
| 50 | OXA1L (1)         | <i>H. sapiens</i>    | PDB: 6ZM5  | 800  | 18  | 20 $\mu$ s |
| 51 | OXA1L-peptide (2) | <i>H. sapiens</i>    | PDB: 6ZM5  | 800  | 0   | 20 $\mu$ s |
| 52 | Cox18 (1)         | <i>S. cerevisiae</i> | ID: P53239 | 800  | 47  | 20 $\mu$ s |
| 53 | Alb3 (1)          | <i>A. thaliana</i>   | ID: Q8LBP4 | 800  | 24  | 20 $\mu$ s |
| 54 | Emc1 (1)          | <i>S. cerevisiae</i> | PDB: 6WB9  | 800  | 0   | 20 $\mu$ s |
| 55 | Emc3 (1)          | <i>S. cerevisiae</i> | PDB: 6WB9  | 800  | 113 | 20 $\mu$ s |
| 56 | Emc4 (1)          | <i>S. cerevisiae</i> | PDB: 6WB9  | 800  | 115 | 20 $\mu$ s |
| 57 | Emc5 (1)          | <i>S. cerevisiae</i> | PDB: 6WB9  | 800  | 0   | 20 $\mu$ s |
| 58 | Emc6 (1)          | <i>S. cerevisiae</i> | PDB: 6WB9  | 800  | 1   | 20 $\mu$ s |

|    |                                                                                                     |                      |                          |      |     |            |
|----|-----------------------------------------------------------------------------------------------------|----------------------|--------------------------|------|-----|------------|
| 59 | EMC complex (8)                                                                                     | <i>S. cerevisiae</i> | PDB: 6WB9                | 1000 | 170 | 20 $\mu$ s |
| 60 | Get1 (1)                                                                                            | <i>S. cerevisiae</i> | ID: P53192               | 800  | 56  | 20 $\mu$ s |
| 61 | Get1 (1)<br>F113L W147L W189L                                                                       | <i>S. cerevisiae</i> | ID: P53192               | 600  | 85  | 20 $\mu$ s |
| 62 | Get1 (1)<br>F113L G120L W147L<br>G185L W189L                                                        | <i>S. cerevisiae</i> | ID: P53192               | 600  | 22  | 20 $\mu$ s |
| 63 | Get1 (1)<br>K16L Q19L R104L<br>K116L W189L N193L<br>N196L Q199L                                     | <i>S. cerevisiae</i> | ID: P53192               | 800  | 36  | 20 $\mu$ s |
| 64 | Get1 (1)<br>T109L K116L K121L<br>W147L Y149L S183L<br>G185L W189L N193L<br>N196L                    | <i>S. cerevisiae</i> | ID: P53192               | 800  | 0   | 20 $\mu$ s |
| 65 | Get2 (1)                                                                                            | <i>S. cerevisiae</i> | ID: P40056               | 800  | 7   | 20 $\mu$ s |
| 66 | Get1 - Get2 (2)                                                                                     | <i>S. cerevisiae</i> | ID: P53192<br>ID: P40056 | 800  | 71  | 20 $\mu$ s |
| 67 | GET complex (4)                                                                                     | <i>S. cerevisiae</i> | ID: P53192<br>ID: P40056 | 800  | 142 | 20 $\mu$ s |
| 68 | GET complex (4)<br>R148L K328L R416L<br>K428 K433L E511L                                            | <i>S. cerevisiae</i> | ID: P53192<br>ID: P40056 | 800  | 176 | 20 $\mu$ s |
| 69 | GET complex (4)<br>T421L K428L K433L<br>W459L Y461L S495L<br>G497L W501L N505L<br>N508L             | <i>S. cerevisiae</i> | ID: P53192<br>ID: P40056 | 800  | 22  | 20 $\mu$ s |
| 70 | GET complex (4)<br>T421L K428L G432L<br>K433L G458L W459L<br>Y461L S495L G497L<br>W501L N505L N508L | <i>S. cerevisiae</i> | ID: P53192<br>ID: P40056 | 800  | 22  | 20 $\mu$ s |
| 71 | WRB (1)                                                                                             | <i>H. sapiens</i>    | PDB: 6SO5                | 800  | 7   | 20 $\mu$ s |
| 72 | CAML (1)                                                                                            | <i>H. sapiens</i>    | PDB: 6SO5                | 800  | 2   | 20 $\mu$ s |
| 73 | WRB - CAML (2)                                                                                      | <i>H. sapiens</i>    | PDB: 6SO5                | 800  | 22  | 20 $\mu$ s |
| 74 | WRB - CAML (4)                                                                                      | <i>H. sapiens</i>    | PDB: 6SO5                | 800  | 55  | 20 $\mu$ s |
| 75 | TRC complex (6)                                                                                     | <i>H. sapiens</i>    | PDB: 6SO5                | 800  | 39  | 20 $\mu$ s |
| 76 | TMCO1 (1)                                                                                           | <i>H. sapiens</i>    | PDB: 6W6L                | 600  | 70  | 20 $\mu$ s |
| 77 | C20orf24 (1)                                                                                        | <i>H. sapiens</i>    | PDB: 6W6L                | 600  | 14  | 20 $\mu$ s |
| 78 | GEL complex (2)                                                                                     | <i>H. sapiens</i>    | PDB: 6W6L                | 800  | 80  | 20 $\mu$ s |
| 79 | Nicalin (1)                                                                                         | <i>H. sapiens</i>    | PDB: 6W6L                | 600  | 0   | 20 $\mu$ s |

|     |                                                  |                      |                         |      |    |            |
|-----|--------------------------------------------------|----------------------|-------------------------|------|----|------------|
| 80  | NOMO (1)                                         | <i>H. sapiens</i>    | PDB: 6W6L               | 600  | 0  | 20 $\mu$ s |
| 81  | TMEM147 (1)                                      | <i>H. sapiens</i>    | PDB: 6W6L               | 600  | 12 | 20 $\mu$ s |
| 82  | BOS complex (3)                                  | <i>H. sapiens</i>    | PDB: 6W6L               | 800  | 19 | 20 $\mu$ s |
| 83  | PAT complex (2)                                  | <i>H. sapiens</i>    | ID: Q9Y284<br>PDB: 6W6L | 800  | 5  | 20 $\mu$ s |
| 84  | Atp13a1 (1)                                      | <i>H. sapiens</i>    | ID: Q9HD20              | 800  | 26 | 20 $\mu$ s |
| 85  | Atp13a1 (1)                                      | <i>M. musculus</i>   | ID: Q9EPE9              | 800  | 20 | 20 $\mu$ s |
| 86  | Shr3 (1)                                         | <i>S. cerevisiae</i> | ID: Q02774              | 800  | 3  | 20 $\mu$ s |
| 87  | Hrd1 (1)                                         | <i>S. cerevisiae</i> | PDB: 6VJZ               | 800  | 22 | 20 $\mu$ s |
| 88  | Der1 (1)                                         | <i>S. cerevisiae</i> | PDB: 6VJZ               | 800  | 1  | 20 $\mu$ s |
| 89  | Hrd1-Der1 (2)                                    | <i>S. cerevisiae</i> | PDB: 6VJZ               | 800  | 28 | 20 $\mu$ s |
| 90  | ERAD complex (4)                                 | <i>S. cerevisiae</i> | PDB: 6VJZ               | 800  | 32 | 20 $\mu$ s |
| 91  | Sec61 $\alpha$ - Sec61 $\gamma$ (2)              | <i>C. familiaris</i> | PDB: 6Z3T               | 800  | 98 | 20 $\mu$ s |
| 92  | SEC61 complex (3)                                | <i>H. sapiens</i>    | PDB: 8DNV               | 800  | 26 | 20 $\mu$ s |
| 93  | SEC61 complex (3)                                | <i>H. sapiens</i>    | PDB: 8DNW               | 800  | 42 | 20 $\mu$ s |
| 94  | Sec61 $\alpha$ (1)                               | <i>H. sapiens</i>    | PDB: 8B6L               | 800  | 46 | 20 $\mu$ s |
| 95  | Sec61 $\beta$ (1)                                | <i>H. sapiens</i>    | PDB: 8B6L               | 800  | 0  | 20 $\mu$ s |
| 96  | Sec61 $\gamma$ (1)                               | <i>H. sapiens</i>    | PDB: 8B6L               | 800  | 0  | 20 $\mu$ s |
| 97  | SEC61 complex (3)                                | <i>H. sapiens</i>    | PDB: 8B6L               | 800  | 13 | 20 $\mu$ s |
| 98  | Trap $\alpha$ (1)                                | <i>H. sapiens</i>    | PDB: 8B6L               | 800  | 0  | 20 $\mu$ s |
| 99  | Trap $\beta$ (1)                                 | <i>H. sapiens</i>    | PDB: 8B6L               | 800  | 0  | 20 $\mu$ s |
| 100 | Trap $\gamma$ (1)                                | <i>H. sapiens</i>    | PDB: 8B6L               | 800  | 20 | 20 $\mu$ s |
| 101 | Trap $\delta$ (1)                                | <i>H. sapiens</i>    | PDB: 8B6L               | 800  | 0  | 20 $\mu$ s |
| 102 | Trap $\beta$ - Trap $\delta$ - Trap $\gamma$ (3) | <i>H. sapiens</i>    | PDB: 8B6L               | 800  | 4  | 20 $\mu$ s |
| 103 | TRAP complex (4)                                 | <i>H. sapiens</i>    | PDB: 8B6L               | 800  | 7  | 20 $\mu$ s |
| 104 | SEC61 complex - TRAP complex (7)                 | <i>H. sapiens</i>    | PDB: 8B6L               | 1000 | 26 | 20 $\mu$ s |
| 105 | RPN1 (1)                                         | <i>H. sapiens</i>    | PDB: 8B6L               | 800  | 0  | 20 $\mu$ s |
| 106 | RPN2 (1)                                         | <i>H. sapiens</i>    | PDB: 8B6L               | 1200 | 0  | 20 $\mu$ s |
| 107 | OST4 (1)                                         | <i>H. sapiens</i>    | PDB: 8B6L               | 600  | 1  | 20 $\mu$ s |
| 108 | OST48 (1)                                        | <i>H. sapiens</i>    | PDB: 8B6L               | 800  | 1  | 20 $\mu$ s |
| 109 | DAD1 (1)                                         | <i>H. sapiens</i>    | PDB: 8B6L               | 600  | 32 | 20 $\mu$ s |
| 110 | STT3a (1)                                        | <i>H. sapiens</i>    | PDB: 8B6L               | 800  | 50 | 20 $\mu$ s |

|     |                                                  |                      |            |      |     |            |
|-----|--------------------------------------------------|----------------------|------------|------|-----|------------|
| 111 | TMEM258 (1)                                      | <i>H. sapiens</i>    | PDB: 8B6L  | 600  | 3   | 20 $\mu$ s |
| 112 | OSTC (1)                                         | <i>H. sapiens</i>    | PDB: 8B6L  | 800  | 132 | 20 $\mu$ s |
| 113 | OSTA complex (8)                                 | <i>H. sapiens</i>    | PDB: 8B6L  | 1600 | 35  | 20 $\mu$ s |
| 114 | SEC61 complex - OSTA complex (11)                | <i>H. sapiens</i>    | PDB: 8B6L  | 1600 | 35  | 20 $\mu$ s |
| 115 | SEC61 complex - TRAP complex - OSTA complex (15) | <i>H. sapiens</i>    | PDB: 8B6L  | 1800 | 72  | 20 $\mu$ s |
| 116 | Tom5 (1)                                         | <i>S. cerevisiae</i> | PDB: 6UCU  | 800  | 0   | 20 $\mu$ s |
| 117 | Tom6 (1)                                         | <i>S. cerevisiae</i> | PDB: 6UCU  | 800  | 0   | 20 $\mu$ s |
| 118 | Tom7 (1)                                         | <i>S. cerevisiae</i> | PDB: 6UCU  | 800  | 0   | 20 $\mu$ s |
| 119 | Tom22 (1)                                        | <i>S. cerevisiae</i> | PDB: 6UCU  | 800  | 0   | 20 $\mu$ s |
| 120 | Tom40 (1)                                        | <i>S. cerevisiae</i> | PDB: 6UCU  | 800  | 30  | 20 $\mu$ s |
| 121 | TOM complex (5)                                  | <i>S. cerevisiae</i> | PDB: 6UCU  | 800  | 56  | 20 $\mu$ s |
| 122 | TOM complex (10)                                 | <i>S. cerevisiae</i> | PDB: 6UCU  | 1200 | 119 | 20 $\mu$ s |
| 123 | BamA (1)                                         | <i>E. coli</i>       | PDB: 6QGW  | 800  | 30  | 20 $\mu$ s |
| 124 | TamA (1)                                         | <i>E. coli</i>       | PDB: 4C00  | 800  | 112 | 20 $\mu$ s |
| 125 | Oep80 (1)                                        | <i>A. thaliana</i>   | ID: Q9C5J8 | 800  | 26  | 20 $\mu$ s |
| 126 | Sam50 (1)                                        | <i>S. cerevisiae</i> | PDB: 7BTW  | 600  | 125 | 20 $\mu$ s |
| 127 | Sam50 (1)                                        | <i>S. cerevisiae</i> | PDB: 7BTX  | 800  | 84  | 20 $\mu$ s |
| 128 | Sam50 - Sam50 (2)                                | <i>S. cerevisiae</i> | PDB: 7BTW  | 800  | 76  | 20 $\mu$ s |
| 129 | Sam50 - Mdm10 (2)                                | <i>S. cerevisiae</i> | PDB: 7BTY  | 800  | 54  | 20 $\mu$ s |
| 130 | Sam50 - Tom40 (2)                                | <i>S. cerevisiae</i> | PDB: 7E4H  | 800  | 77  | 20 $\mu$ s |
| 131 | SAM complex (3)                                  | <i>S. cerevisiae</i> | PDB: 7BTX  | 800  | 54  | 20 $\mu$ s |
| 132 | Tim22 (1)                                        | <i>S. cerevisiae</i> | PDB: 6LO8  | 800  | 127 | 20 $\mu$ s |
| 133 | Tim18 (1)                                        | <i>S. cerevisiae</i> | PDB: 6LO8  | 800  | 56  | 20 $\mu$ s |
| 134 | Tim54 (1)                                        | <i>S. cerevisiae</i> | PDB: 6LO8  | 800  | 5   | 20 $\mu$ s |
| 135 | Sdh3 (1)                                         | <i>S. cerevisiae</i> | PDB: 6LO8  | 800  | 15  | 20 $\mu$ s |
| 136 | TIM22 complex (10)                               | <i>S. cerevisiae</i> | PDB: 6LO8  | 1000 | 246 | 20 $\mu$ s |
| 137 | Tim22 (1)                                        | <i>H. sapiens</i>    | PDB: 7CGP  | 800  | 49  | 20 $\mu$ s |
| 138 | TIM22 complex (15)                               | <i>H. sapiens</i>    | PDB: 7CGP  | 1200 | 60  | 20 $\mu$ s |
| 139 | Tim23 (1)                                        | <i>S. cerevisiae</i> | PDB: 8SCX  | 800  | 2   | 20 $\mu$ s |
| 140 | Tim17 (1)                                        | <i>S. cerevisiae</i> | PDB: 8SCX  | 800  | 250 | 20 $\mu$ s |
| 141 | Tim17                                            | <i>S. cerevisiae</i> | PDB: 8SCX  | 800  | 127 | 20 $\mu$ s |

|     |                                        |                      |                                        |      |     |            |
|-----|----------------------------------------|----------------------|----------------------------------------|------|-----|------------|
|     | D17L, D76L, E126L (1)                  |                      |                                        |      |     |            |
| 142 | Mgr2 (1)                               | <i>S. cerevisiae</i> | ID: Q02889                             | 800  | 27  | 20 $\mu$ s |
| 143 | Tim17 - Mgr2 (2)                       | <i>S. cerevisiae</i> | PDB: 8SCX<br>ID: Q02889                | 800  | 7   | 20 $\mu$ s |
| 144 | Tim17 - Mgr2 - Tim23 (3)               | <i>S. cerevisiae</i> | PDB: 8SCX<br>ID: Q02889                | 800  | 29  | 20 $\mu$ s |
| 145 | Tim17 - Tim23 - Tim44 - Mgr2 (4)       | <i>S. cerevisiae</i> | PDB: 8SCX<br>ID: Q02889                | 800  | 21  | 20 $\mu$ s |
| 146 | TIM23 complex (3)                      | <i>S. cerevisiae</i> | PDB: 8SCX                              | 1000 | 157 | 20 $\mu$ s |
| 147 | Tim17 (1)                              | <i>H. sapiens</i>    | ID: Q99595                             | 800  | 213 | 20 $\mu$ s |
| 148 | Tim17<br>D16L, D77L, E127L (1)         | <i>H. sapiens</i>    | ID: Q99595                             | 800  | 124 | 20 $\mu$ s |
| 149 | Tim23 (1)                              | <i>H. sapiens</i>    | ID: O14925                             | 800  | 30  | 20 $\mu$ s |
| 150 | Tim17 - Tim23 (2)                      | <i>H. sapiens</i>    | ID: Q99595<br>ID: O14925               | 800  | 182 | 20 $\mu$ s |
| 151 | Tim50 (1)                              | <i>H. sapiens</i>    | ID: Q3ZCQ8                             | 1200 | 0   | 20 $\mu$ s |
| 152 | TIM23 complex (3)                      | <i>H. sapiens</i>    | ID: Q99595<br>ID: O14925<br>ID: Q3ZCQ8 | 1000 | 170 | 20 $\mu$ s |
| 153 | MTCH1 (1)                              | <i>H. sapiens</i>    | ID: Q9NZJ7                             | 600  | 129 | 20 $\mu$ s |
| 154 | MTCH2 (1)                              | <i>H. sapiens</i>    | ID: Q9NZJ7                             | 800  | 126 | 20 $\mu$ s |
| 155 | MTCH2 Q29L, H142L,<br>D189L, N242L (1) | <i>H. sapiens</i>    | ID: Q9NZJ7                             | 800  | 93  | 20 $\mu$ s |
| 156 | MTCH2-peptide (2)                      | <i>H. sapiens</i>    | ID: Q9NZJ7                             | 800  | 2   | 20 $\mu$ s |
| 157 | SLC25A46 (1)                           | <i>H. sapiens</i>    | ID: Q96AG3                             | 800  | 22  | 20 $\mu$ s |
| 158 | SLC26A9 (2)                            | <i>H. sapiens</i>    | PDB: 7CH1                              | 1000 | 35  | 20 $\mu$ s |
| 159 | SLC25A17 (1)                           | <i>H. sapiens</i>    | ID: O43808                             | 800  | 20  | 20 $\mu$ s |

## Supporting Figures

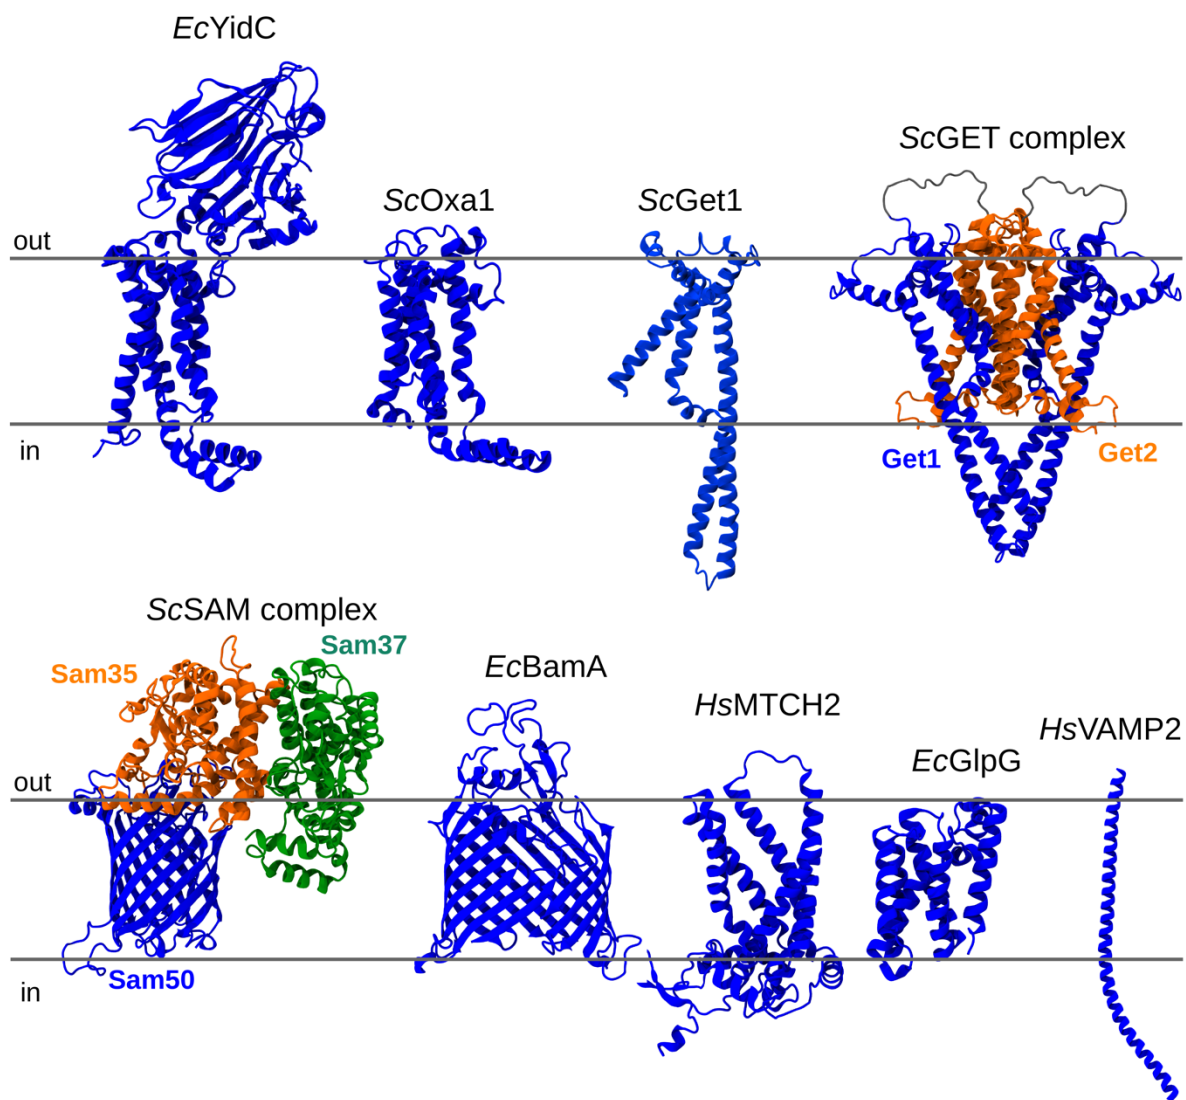

Figure S1. 3D structure of experimentally tested proteins.

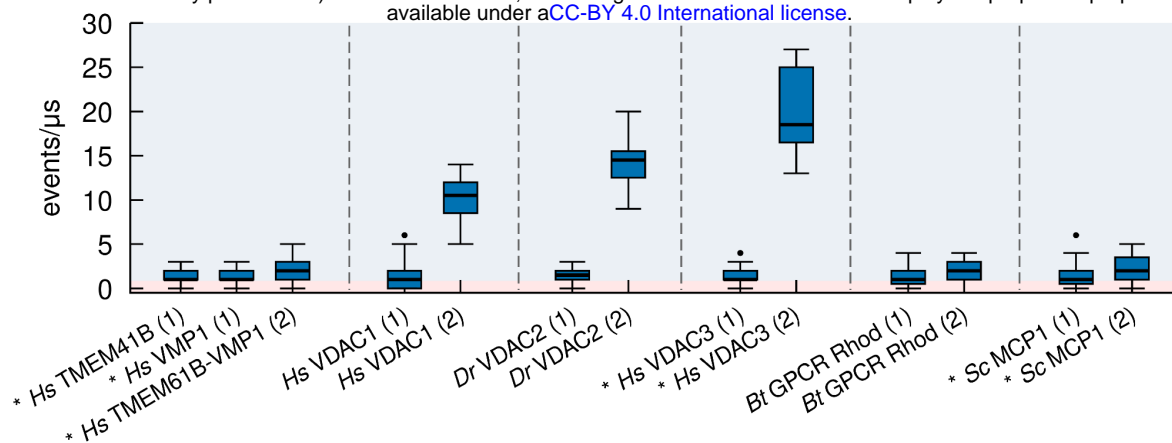

**Figure S2. Oligomerization influences lipid scrambling.** Comparison of lipid scrambling activity between monomeric and dimeric forms of selected scramblases. The blue shaded region represents the behavior for a scrambling-positive protein and the red area for a scrambling-negative protein. AlphaFold structures are denoted by the \* symbol, oligomerization state is in parenthesis.



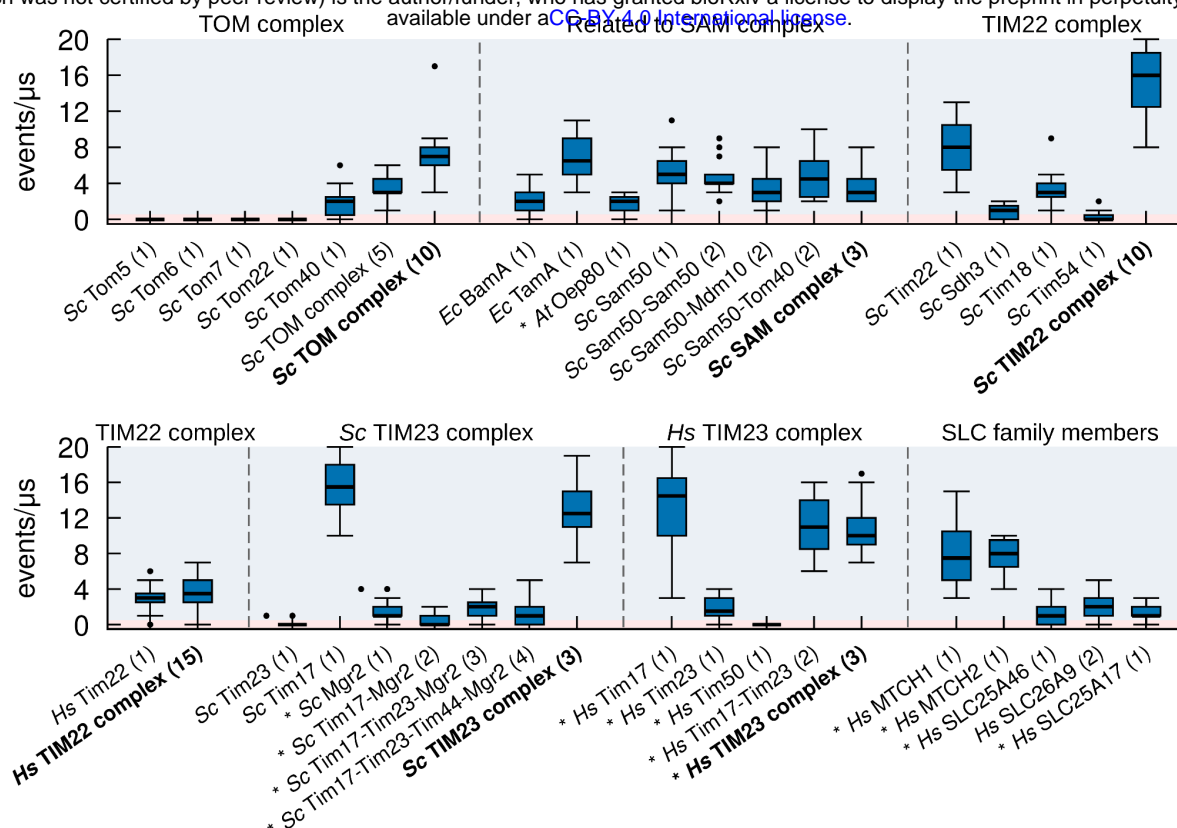

**Figure S3. Extended version of insertase complexes in the mitochondria.** Lipid scrambling activity of individual components and selected complexes for the major mitochondrial insertases investigated. The blue shaded region represents the behavior for a scrambling-positive protein and the red area for a scrambling-negative protein. AF structures are denoted by the \* symbol, oligomerization state is in parenthesis.

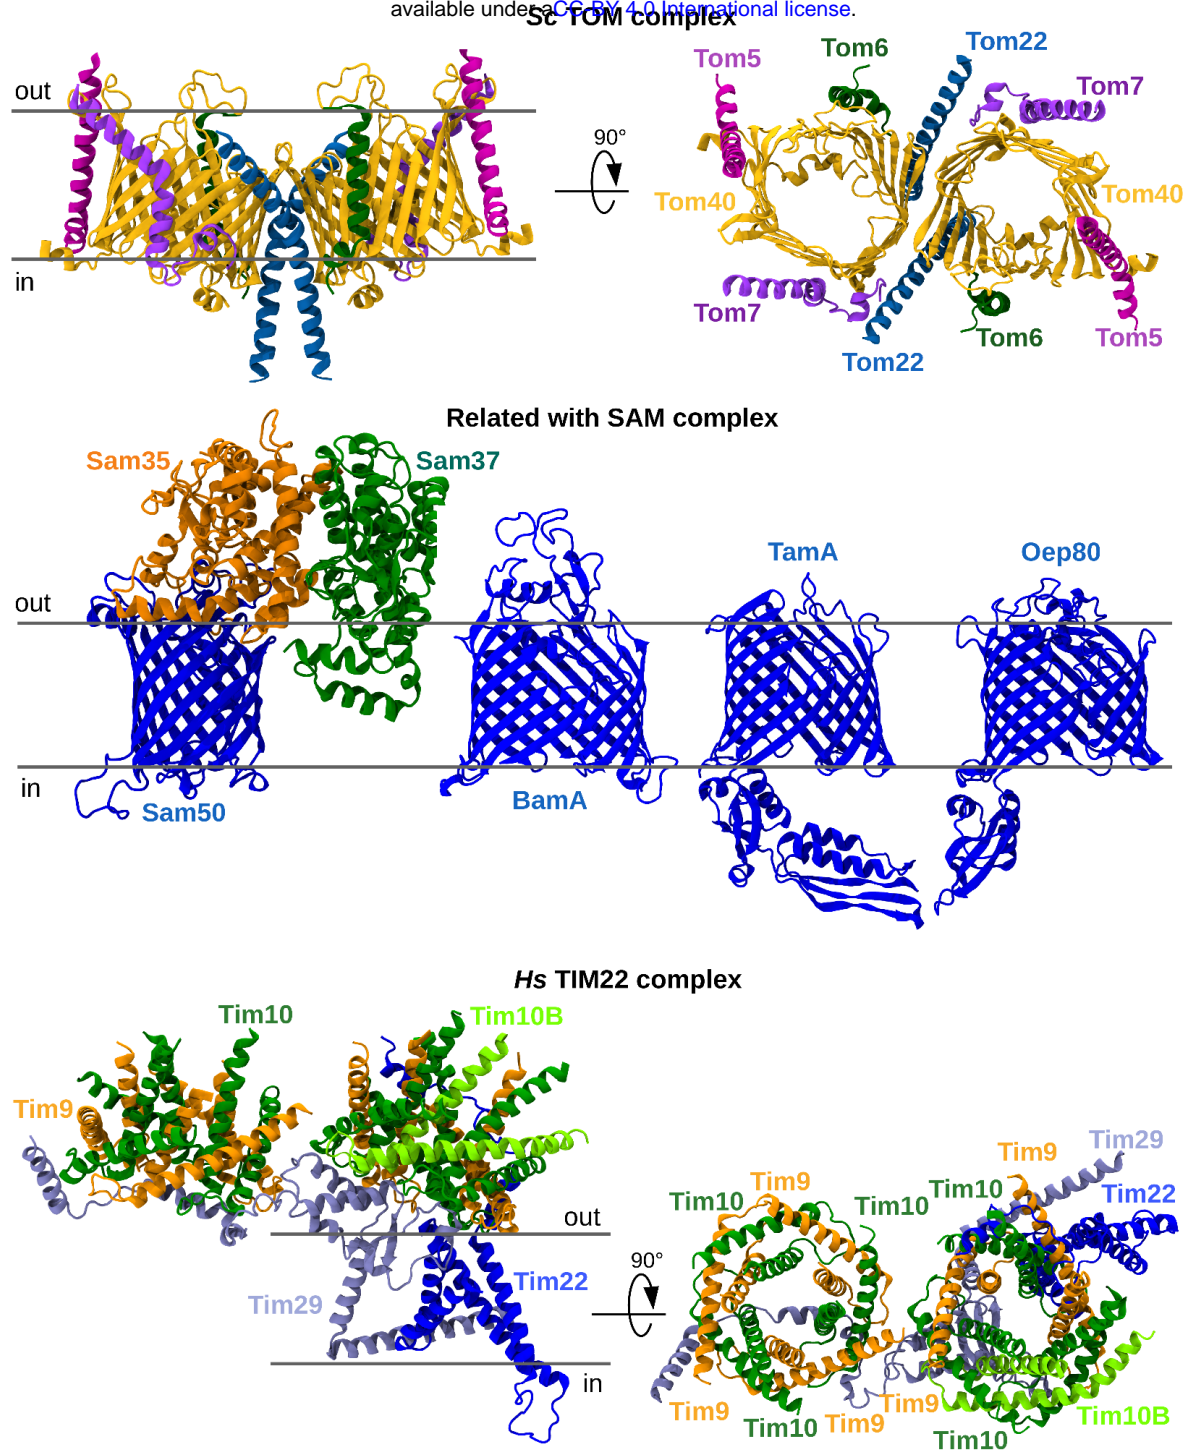

Figure S4. 3D structures of mitochondrial complexes TOM, SAM and HsTIM22.

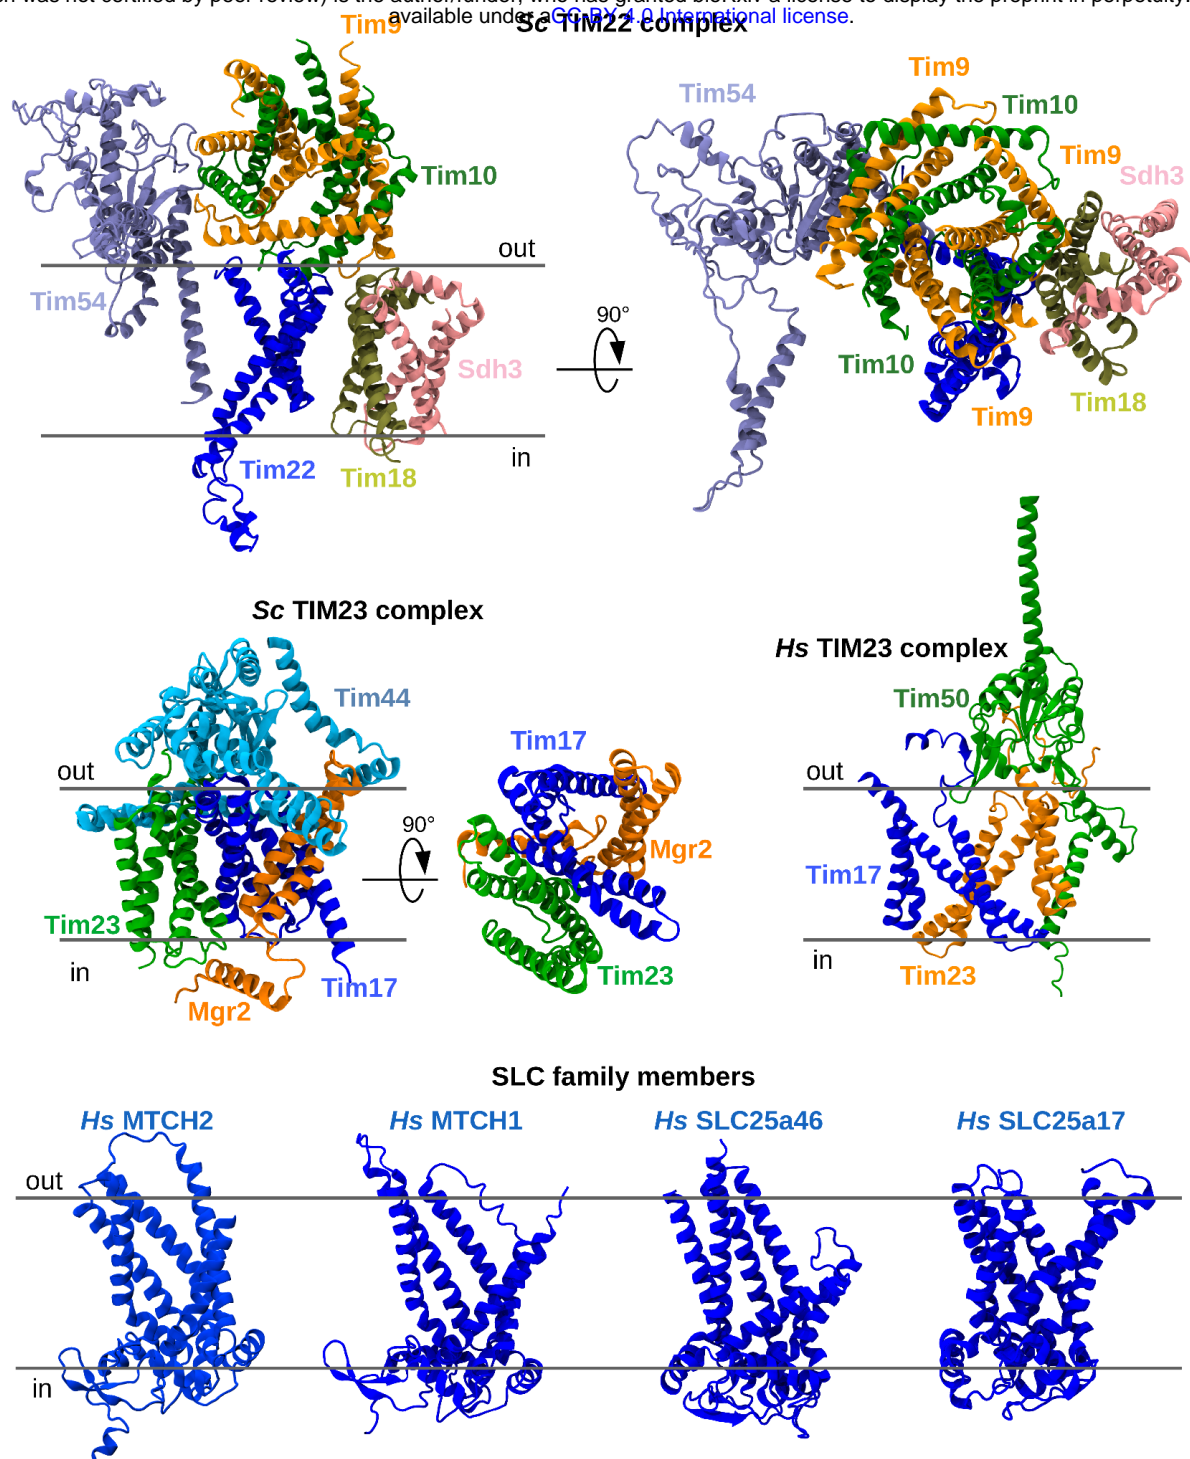

**Figure S5. 3D structures of mitochondrial complexes ScTIM22, ScTIM23, HsTIM23 and SLC proteins MTCH2, MTCH1, SLC25a46 and SLC25a17.**

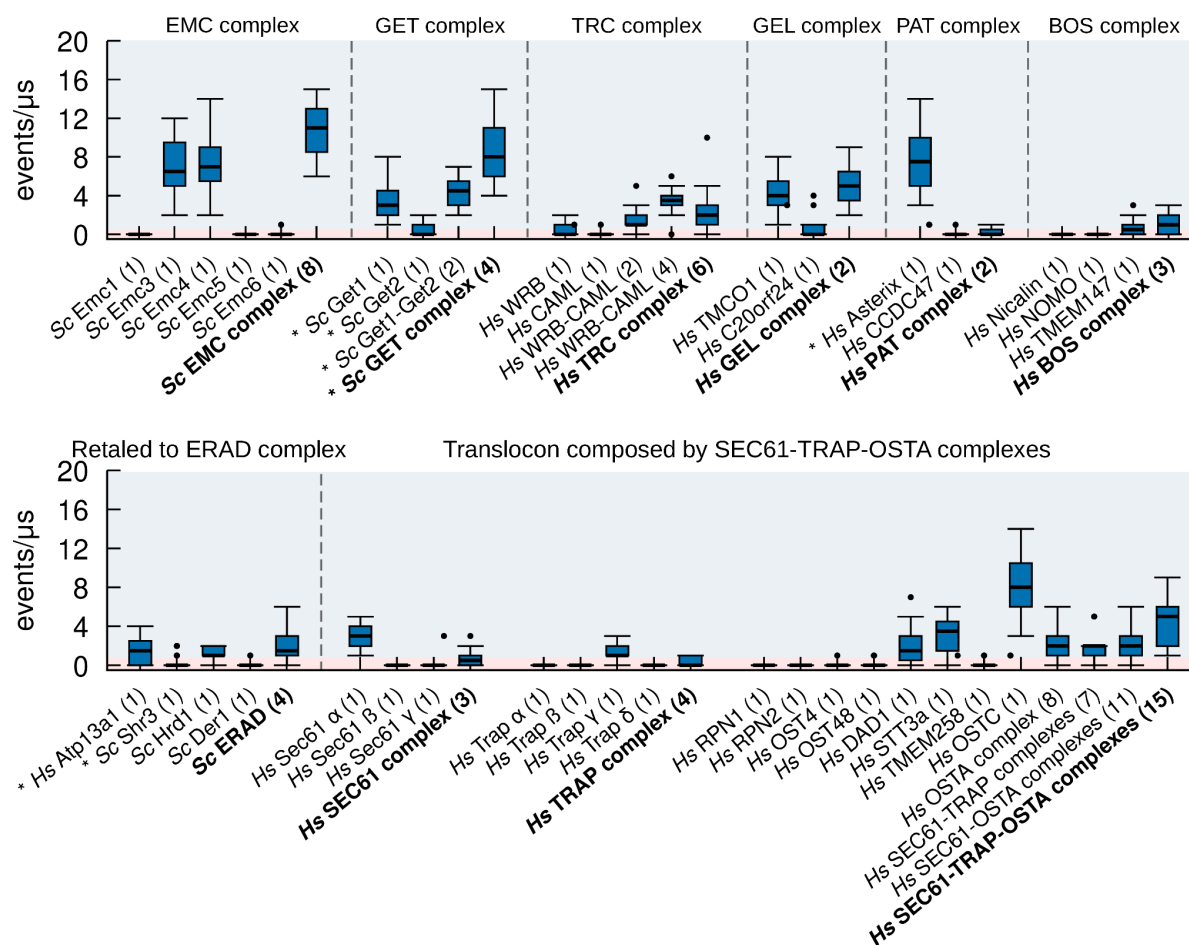

**Figure S6. Extended version of insertase complexes in the endoplasmic reticulum.** Lipid scrambling activity of individual components and selected complexes for the major ER insertases investigated. The blue shaded region represents the behavior for a scrambling-positive protein and the red area for a scrambling-negative protein. AlphaFold structures are denoted by the \* symbol, oligomerization state is in parenthesis.

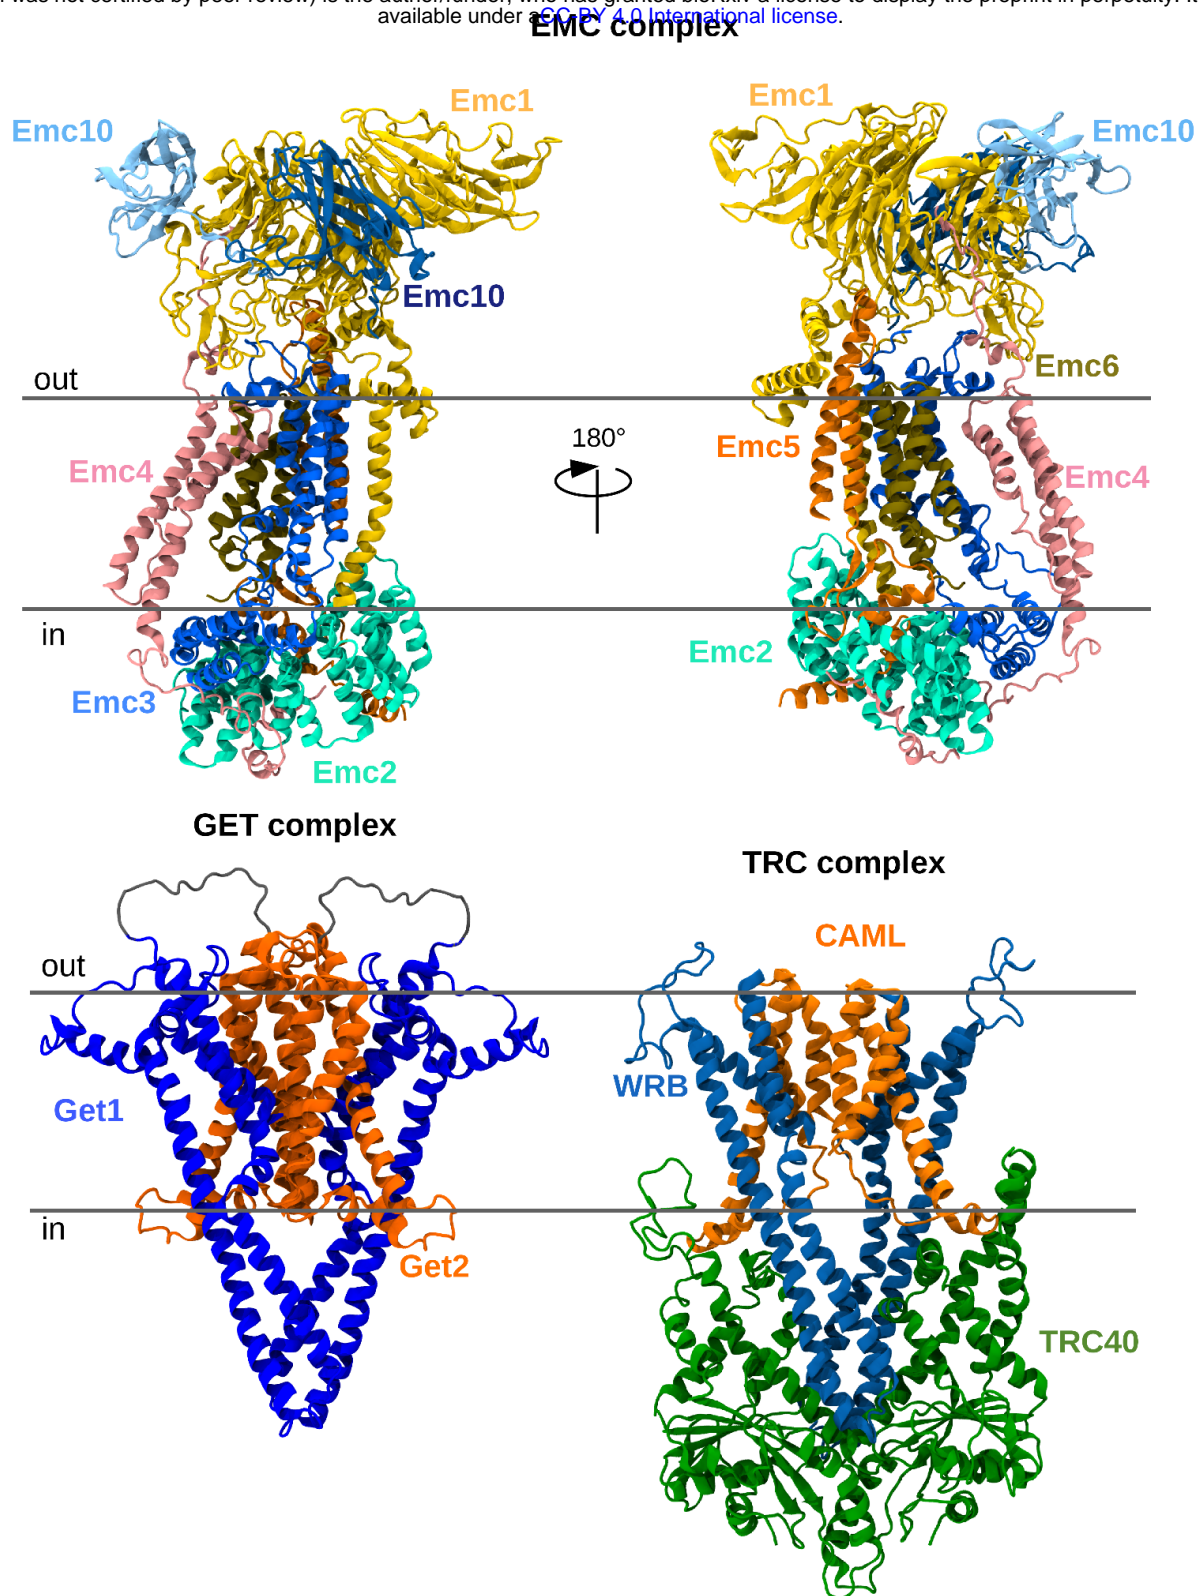

**Figure S7. 3D structures of ER complexes EMC, GET and TRC.**

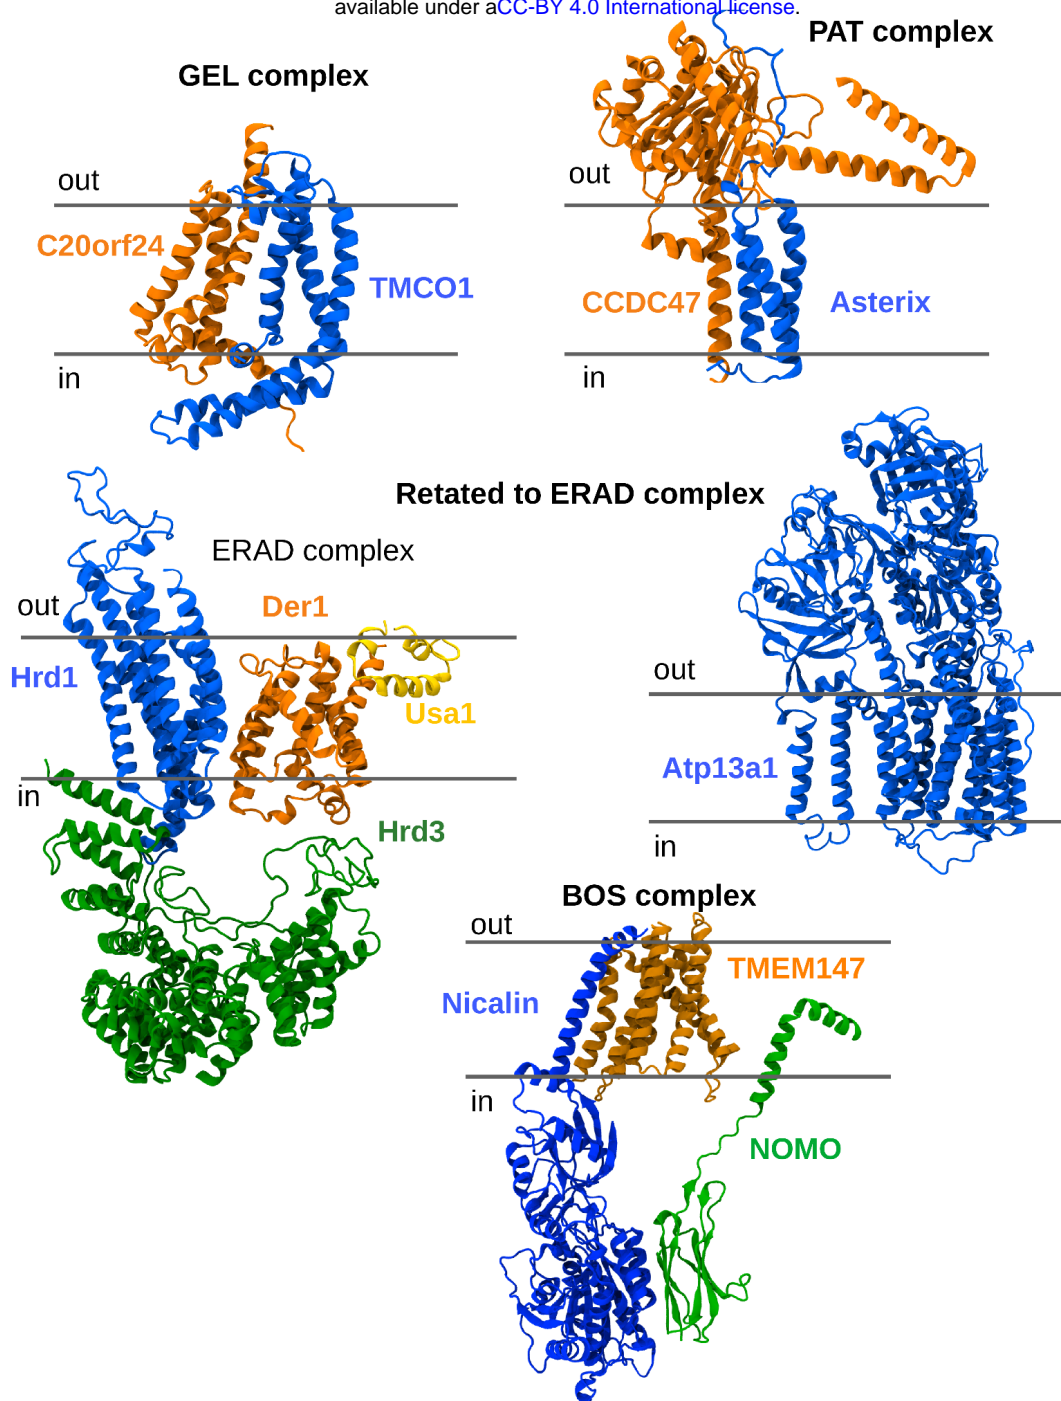

Figure S8. 3D structures of ER complexes GEL, PAT, ERAD, Atp13a1 and BOS complex.

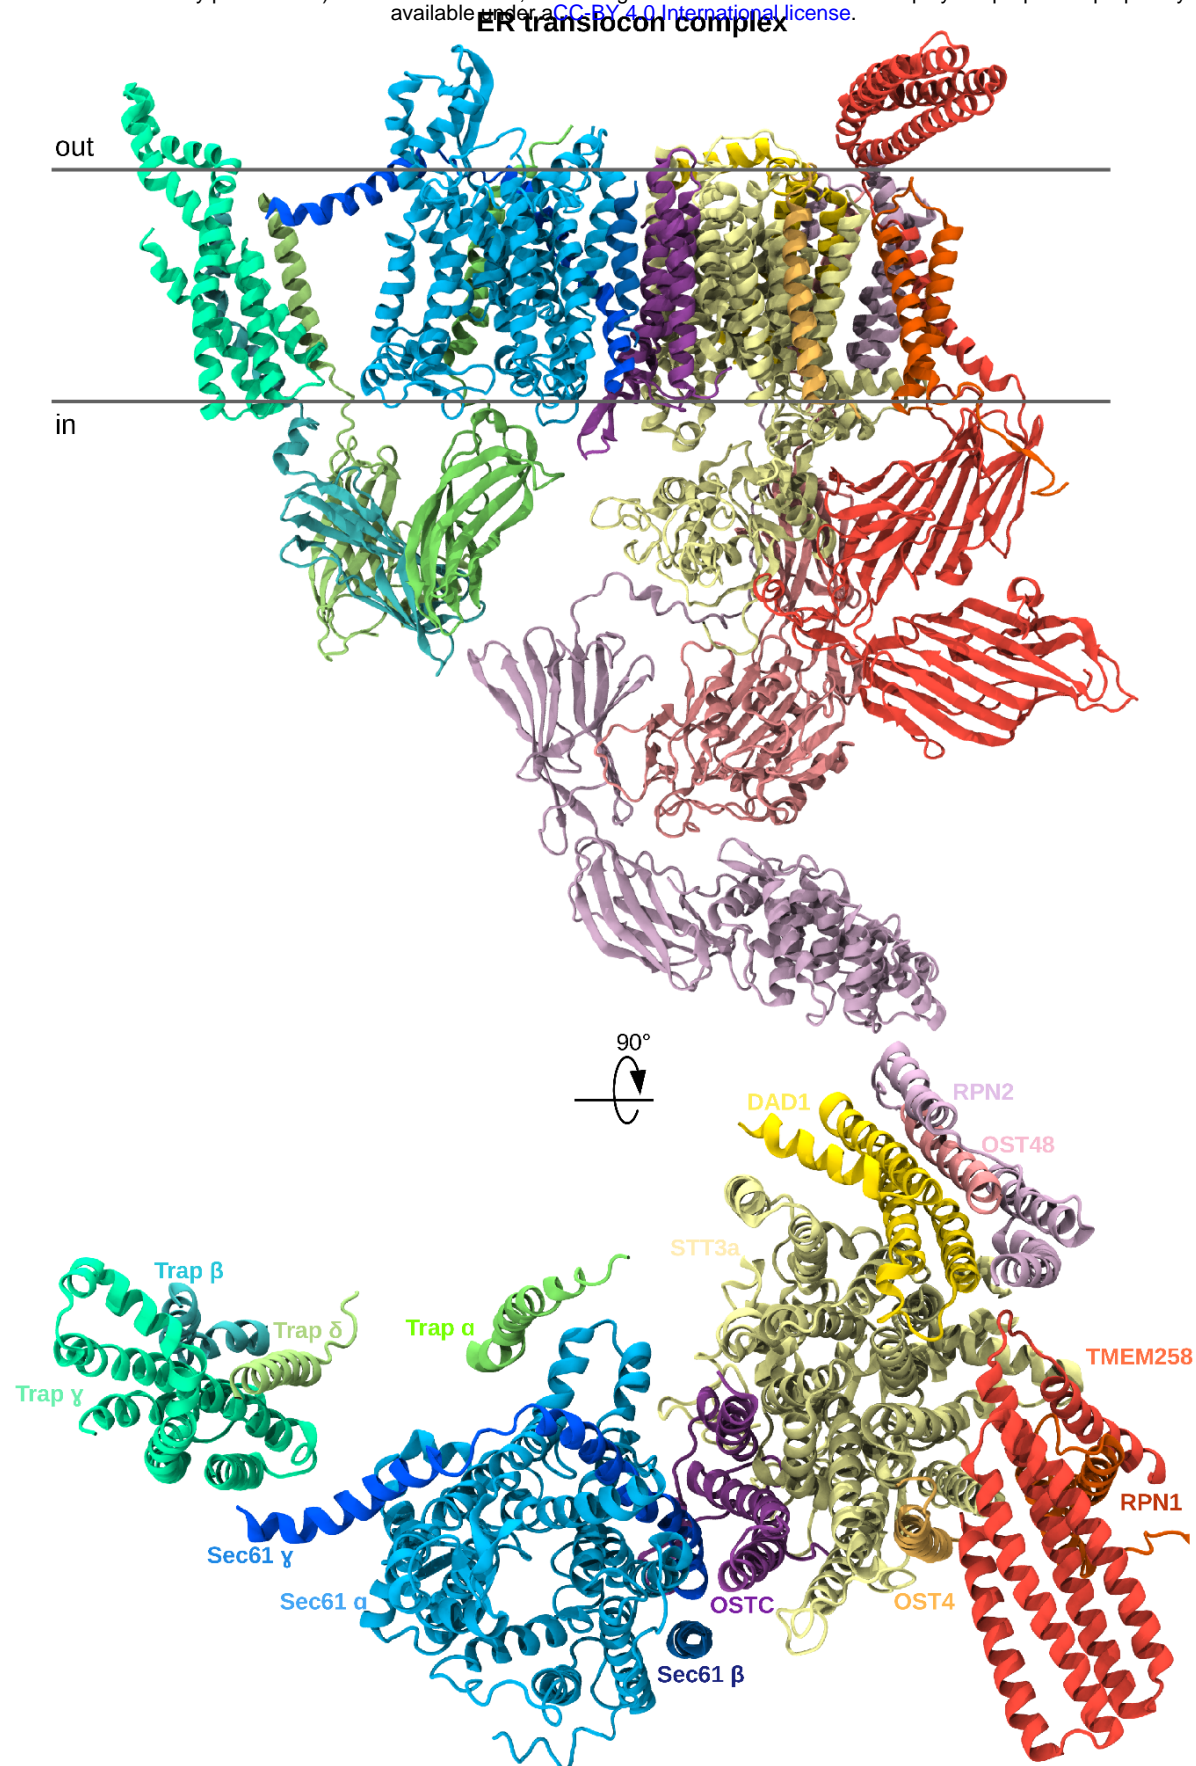

**Figure S9. 3D structure of *Hs*SEC61-TRAP-OSTA complex.**

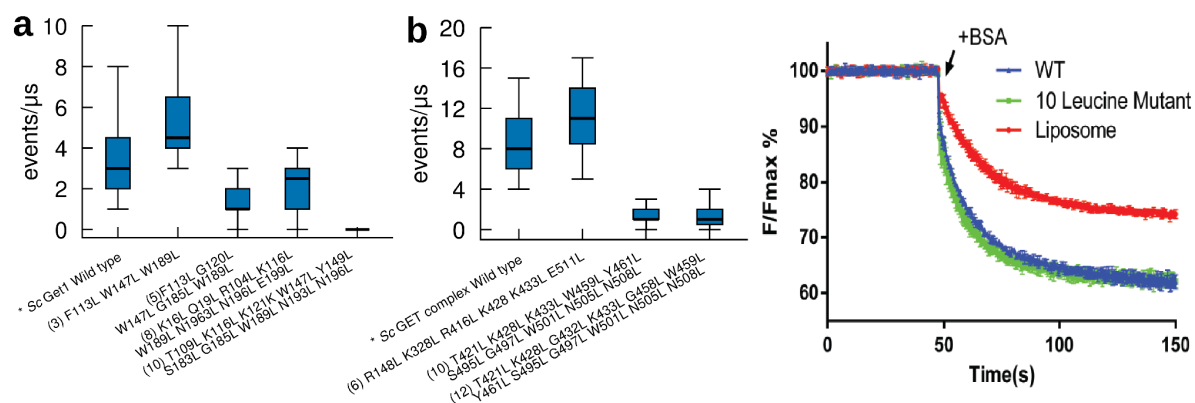

**Figure S10. Mutational analysis of lipid scrambling in Get1 and GET complex. a.** Scrambling activity calculations from CG-MD simulations of the wild type and various mutants of the ScGet1 subunit. 10 mutations (10L) are required to completely ablate lipid scrambling activity in ScGet1 **b. Left.** Scrambling activity calculations from CG-MD simulations of the wild type and various mutants of the ScGET complex. Neither the same 10L mutations on Get1 and a new 12L mutations were able to ablate lipid scrambling activity in silico in the ScGET complex. **Right.** Lipid scrambling activity of wt and L10 mutant GET. The scramblase assay for Get2-1sc mutant was carried out with FluoroMax+ spectrofluorometer (HORIBA). For each reaction, 50uL of the proteoliposomes were added to 1950uL of the reconstitution buffer. The sample was vigorously stirred and measured for fluorescence at 460/538 nm for 50-70 seconds to establish a stable baseline. 50uL of 1.5mg/mL fatty acid-free BSA was added, and fluorescence data were collected for another 200s. Both the WT complex and the mutant version with 10 mutations in the translocation channel (T421L/K428L/K433L/W459L/Y461L/S495L/G497L/W501L/N505L/N508L in Get1) scramble NBD-PC. **a-b.** The total number of mutations is in parentheses.



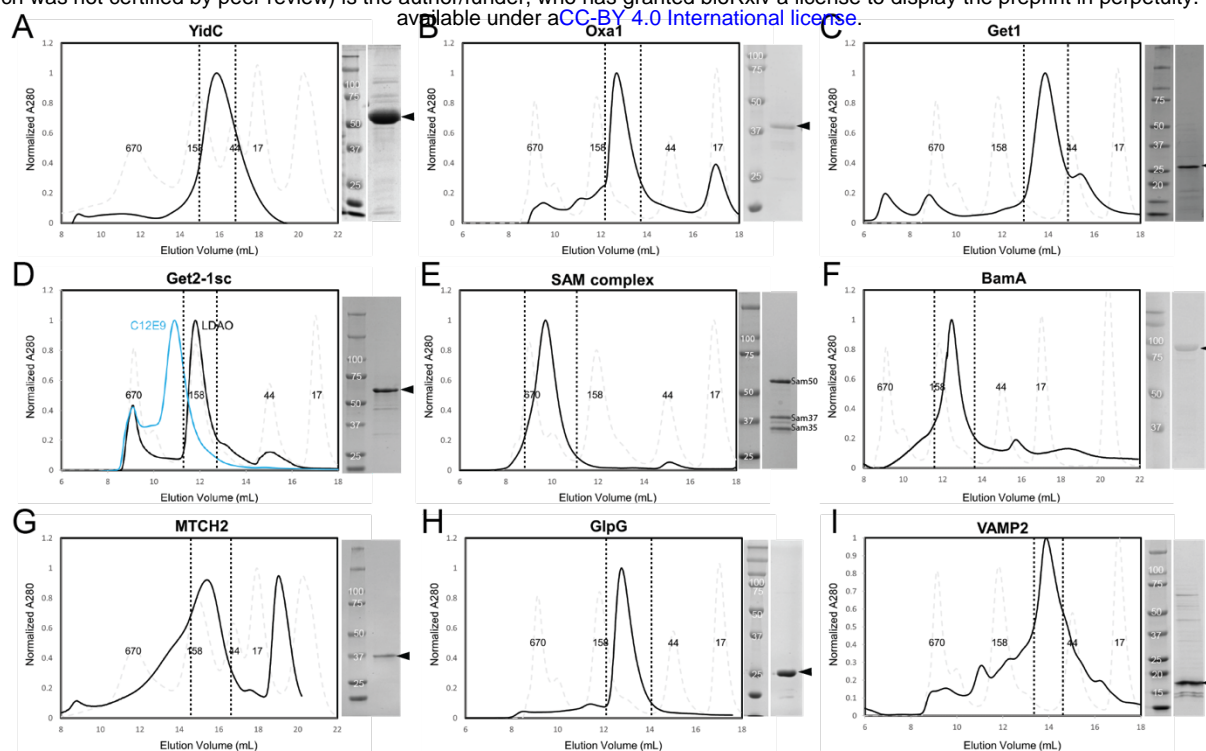

**Figure S11. Size-exclusion chromatography analyses of proteins used in reconstitutions.** Proteins for in vitro reconstitution were purified by size exclusion chromatography. Traces are shown (black) along with traces of the molecular weight standards (dotted grey); fractions used for reconstitutions are indicated (dotted black lines). Note that the elution volume of each protein reflects its size including detergent micelle. SDS-PAGE analysis of the purified protein is to the right of each chromatographic trace.
